# Supplementary material for: Macular Anatomy Differs in Dyslexic Subjects
Source: MDPI journal article supplement (doi:10.3390/jcm12062356), 2023-03-17
Supplement: s1 [file s1]

| Complete retina. Comparisons between groups (Right eyes) |          |    |        |           |            |        |     |                     |
|----------------------------------------------------------|----------|----|--------|-----------|------------|--------|-----|---------------------|
|                                                          | Group    | n  | Mean   | Std. dev. | Dif. Mean  | Median | IQR | Significance (test) |
| C0                                                       | Control  | 24 | N/A    | N/A       | N/A        | 254.50 | 17  | .417 (MWT)          |
|                                                          | Dyslexia | 21 | 263.67 | 18.076    |            | 260.00 | 18  |                     |
| N1                                                       | Control  | 24 | 333.75 | 11.939    | -10.869    | N/A    | N/A | .003 (UTT)          |
|                                                          | Dyslexia | 21 | 344.62 | 11.373    |            | N/A    | N/A |                     |
| N2                                                       | Control  | 24 | 314.71 | 14.085    | -5.482     | N/A    | N/A | .238 (UTT)          |
|                                                          | Dyslexia | 21 | 320.19 | 16.669    |            | N/A    | N/A |                     |
| S1                                                       | Control  | 24 | 334.92 | 11.424    | -7.321     | N/A    | N/A | .032 (UTT)          |
|                                                          | Dyslexia | 21 | 342.24 | 10.573    |            | N/A    | N/A |                     |
| S2                                                       | Control  | 24 | 295.58 | 12.169    | -5.607     | N/A    | N/A | .176 (UTT)          |
|                                                          | Dyslexia | 21 | 301.19 | 15.155    |            | N/A    | N/A |                     |
| T1                                                       | Control  | 24 | 321.75 | 9.830     | -6.298     | N/A    | N/A | .029 (UTT)          |
|                                                          | Dyslexia | 21 | 328.05 | 8.657     |            | N/A    | N/A |                     |
| T2                                                       | Control  | 24 | 279.71 | 11.331    | -4.720     | N/A    | N/A | .190 (UTT)          |
|                                                          | Dyslexia | 21 | 284.43 | 12.440    |            | N/A    | N/A |                     |
| I1                                                       | Control  | 24 | 332.08 | 10.202    | -8.155     | N/A    | N/A | .019 (UTT)          |
|                                                          | Dyslexia | 21 | 340.24 | 12.165    |            | N/A    | N/A |                     |
| I2                                                       | Control  | 24 | 289.29 | 15.892    | -2.804     | N/A    | N/A | .572 (UTT)          |
|                                                          | Dyslexia | 21 | 292.10 | 17.097    |            | N/A    | N/A |                     |
| Complete retina. Comparisons between groups (Left eyes)  |          |    |        |           |            |        |     |                     |
|                                                          | Group    | n  | Mean   | Std. dev. | Dif. Means | Median | IQR | Significance (test) |
| C0                                                       | Control  | 25 | N/A    | N/A       | N/A        | 255.00 | 21  | .740 (MWT)          |
|                                                          | Dyslexia | 19 | 262.00 | 18.166    |            | 258.00 | 18  |                     |
| N1                                                       | Control  | 25 | 335.08 | 11.150    | -8.920     | N/A    | N/A | .014 (UTT)          |
|                                                          | Dyslexia | 19 | 344.00 | 11.902    |            | N/A    | N/A |                     |
| N2                                                       | Control  | 25 | 314.56 | 10.595    | -5.598     | N/A    | N/A | .212 (UTT)          |
|                                                          | Dyslexia | 19 | 320.16 | 16.724    |            | N/A    | N/A |                     |
| S1                                                       | Control  | 25 | 334.88 | 11.337    | -8.278     | N/A    | N/A | .028 (UTT)          |
|                                                          | Dyslexia | 19 | 343.16 | 12.742    |            | N/A    | N/A |                     |
| S2                                                       | Control  | 25 | 297.72 | 12.225    | -4.648     | N/A    | N/A | .254 (UTT)          |
|                                                          | Dyslexia | 19 | 302.37 | 14.438    |            | N/A    | N/A |                     |
| T1                                                       | Control  | 25 | 320.44 | 10.288    | -7.297     | N/A    | N/A | .021 (UTT)          |
|                                                          | Dyslexia | 19 | 327.74 | 9.527     |            | N/A    | N/A |                     |
| T2                                                       | Control  | 25 | 278.68 | 11.298    | -5.846     | N/A    | N/A | .109 (UTT)          |
|                                                          | Dyslexia | 19 | 284.53 | 12.281    |            | N/A    | N/A |                     |
| I1                                                       | Control  | 25 | 330.92 | 10.688    | -7.238     | N/A    | N/A | .039 (UTT)          |
|                                                          | Dyslexia | 19 | 338.16 | 11.730    |            | N/A    | N/A |                     |
| I2                                                       | Control  | 25 | 286.56 | 11.288    | -2.177     | N/A    | N/A | .563 (UTT)          |
|                                                          | Dyslexia | 19 | 288.74 | 13.490    |            | N/A    | N/A |                     |

**Table S1. Thickness comparison between groups for the complete retina in the ETDRS grid.** Right and left eyes were separately compared. T=Temporal, N=nasal, S=superior, I=Inferior, C0=fovea. Number 1 and number 2 refer to the inner ring and the outer ring, respectively, and correspond to the parafovea (inner ring) and the perifovea (outer ring). n=number, Std. Dev=standard deviation, Dif.=Difference, IQR=interquartile range, UTT= Unpaired t-test MWT=Mann-Whitney test, N/A=not applicable. The thickness results are expressed as microns. Statistically significant results are depicted in bold.

| Inner retina. Comparisons between groups (Right eyes) |          |    |        |           |           |        |     |                     |
|-------------------------------------------------------|----------|----|--------|-----------|-----------|--------|-----|---------------------|
|                                                       | Group    | n  | Mean   | Std. dev. | Mean Dif. | Median | IQR | Significance (test) |
| C0                                                    | Control  | 24 | N/A    | N/A       | N/A       | 165.5  | 19  | .168 (MWT)          |
|                                                       | Dyslexia | 21 | 178.00 | 18.754    |           | 175.0  | 19  |                     |
| N1                                                    | Control  | 24 | 252.96 | 10.675    | -10.851   | N/A    | N/A | .002 (UTT)          |
|                                                       | Dyslexia | 21 | 263.81 | 11.285    |           | N/A    | N/A |                     |
| N2                                                    | Control  | 24 | 236.58 | 13.065    | -5.274    | N/A    | N/A | .240 (UTT)          |
|                                                       | Dyslexia | 21 | 241.86 | 16.590    |           | N/A    | N/A |                     |
| S1                                                    | Control  | 24 | 255.42 | 9.824     | -8.012    | N/A    | N/A | .011 (UTT)          |
|                                                       | Dyslexia | 21 | 263.43 | 10.443    |           | N/A    | N/A |                     |
| S2                                                    | Control  | 24 | 218.25 | 11.558    | -5.083    | N/A    | N/A | .221 (UTT)          |
|                                                       | Dyslexia | 21 | 223.33 | 15.809    |           | N/A    | N/A |                     |
| T1                                                    | Control  | 24 | 242.46 | 8.241     | -6.875    | N/A    | N/A | .008 (UTT)          |
|                                                       | Dyslexia | 21 | 249.33 | 8.345     |           | N/A    | N/A |                     |
| T2                                                    | Control  | 24 | 203.29 | 10.348    | -4.708    | N/A    | N/A | .172 (UTT)          |
|                                                       | Dyslexia | 21 | 208.00 | 12.377    |           | N/A    | N/A |                     |
| I1                                                    | Control  | 24 | 253.50 | 8.753     | -8.214    | N/A    | N/A | .011 (UTT)          |
|                                                       | Dyslexia | 21 | 261.71 | 11.921    |           | N/A    | N/A |                     |
| I2                                                    | Control  | 24 | 213.29 | 14.959    | -2.327    | N/A    | N/A | .623 (UTT)          |
|                                                       | Dyslexia | 21 | 215.62 | 16.527    |           | N/A    | N/A |                     |
| Inner retinal. Comparisons between groups (Left eyes) |          |    |        |           |           |        |     |                     |
|                                                       | Group    | n  | Mean   | Std. dev. | Mean Dif. | Median | IQR | Significance (test) |
| C0                                                    | Control  | 25 | N/A    | N/A       | N/A       | 166.00 | 22  | .387 (MWT)          |
|                                                       | Dyslexia | 19 | 176.05 | 17.995    |           | 173.00 | 21  |                     |
| N1                                                    | Control  | 25 | 253.16 | 9.919     | -10.419   | N/A    | N/A | .003 (UTT)          |
|                                                       | Dyslexia | 19 | 263.58 | 12.107    |           | N/A    | N/A |                     |
| N2                                                    | Control  | 25 | 236.12 | 9.799     | -6.354    | N/A    | N/A | .150 (UTT)          |
|                                                       | Dyslexia | 19 | 242.47 | 16.645    |           | N/A    | N/A |                     |
| S1                                                    | Control  | 25 | 255.56 | 10.251    | -8.808    | N/A    | N/A | .015 (UTT)          |
|                                                       | Dyslexia | 19 | 264.37 | 12.707    |           | N/A    | N/A |                     |
| S2                                                    | Control  | 25 | 219.96 | 11.667    | -4.829    | N/A    | N/A | .240 (UTT)          |
|                                                       | Dyslexia | 19 | 224.79 | 15.241    |           | N/A    | N/A |                     |
| T1                                                    | Control  | 25 | 241.08 | 8.841     | -8.025    | N/A    | N/A | .006 (UTT)          |
|                                                       | Dyslexia | 19 | 249.11 | 9.279     |           | N/A    | N/A |                     |
| T2                                                    | Control  | 25 | 202.16 | 10.168    | N/A       | 201.00 | 18  | .790 (MWT)          |
|                                                       | Dyslexia | 19 | N/A    | N/A       |           | 207.00 | 23  |                     |
| I1                                                    | Control  | 25 | 252.20 | 9.570     | -8.011    | N/A    | N/A | .016 (UTT)          |
|                                                       | Dyslexia | 19 | 260.21 | 11.679    |           | N/A    | N/A |                     |
| I2                                                    | Control  | 25 | 210.32 | 10.984    | -2.259    | N/A    | N/A | .534 (UTT)          |
|                                                       | Dyslexia | 19 | 212.58 | 12.907    |           | N/A    | N/A |                     |

**Table S2. Thickness comparison between groups for the inner retina in the ETDRS grid.** Right and left eyes were independently compared. T=temporal, N=nasal, S=superior, I=inferior, C0=fovea. Number 1 and number 2 refer to the inner ring and the outer ring, respectively, and correspond to the parafovea (inner ring) and the perifovea (outer ring). n=number, Std. Dev=standard deviation, Dif.=Difference, IQR=interquartile range, UTT= Unpaired t-test MWT=Mann-Whitney test, N/A=not applicable. The thickness results are expressed as microns. Statistically significant results are depicted in bold.

| Middle retinal layers (INL+OPL+ONL). Comparisons between groups (Right eyes) |          |    |        |           |           |        |     |                     |
|------------------------------------------------------------------------------|----------|----|--------|-----------|-----------|--------|-----|---------------------|
|                                                                              | Group    | n  | Mean   | Std. dev. | Mean Dif. | Median | IQR | Significance (test) |
| C0                                                                           | Control  | 24 | 126.79 | 7.785     | -6.351    | N/A    | N/A | .030<br>(UTT)       |
|                                                                              | Dyslexia | 21 | 133.14 | 11.096    |           | N/A    | N/A |                     |
| N1                                                                           | Control  | 24 | 139.88 | 7.116     | -9.935    | N/A    | N/A | .0001<br>(UTT)      |
|                                                                              | Dyslexia | 21 | 149.81 | 8.892     |           | N/A    | N/A |                     |
| N2                                                                           | Control  | 24 | 120.54 | 6.507     | -5.744    | N/A    | N/A | .011<br>(UTT)       |
|                                                                              | Dyslexia | 21 | 126.29 | 8.076     |           | N/A    | N/A |                     |
| S1                                                                           | Control  | 24 | 138.04 | 6.702     | -9.435    | N/A    | N/A | .001<br>(UTT)       |
|                                                                              | Dyslexia | 21 | 147.48 | 10.769    |           | N/A    | N/A |                     |
| S2                                                                           | Control  | 24 | 119.67 | 5.858     | -3.429    | N/A    | N/A | .106<br>(UTT)       |
|                                                                              | Dyslexia | 21 | 123.10 | 8.037     |           | N/A    | N/A |                     |
| T1                                                                           | Control  | 24 | 135.96 | 6.906     | -7.756    | N/A    | N/A | .001<br>(UTT)       |
|                                                                              | Dyslexia | 21 | 143.71 | 6.922     |           | N/A    | N/A |                     |
| T2                                                                           | Control  | 24 | 117.04 | 6.464     | -4.673    | N/A    | N/A | .020<br>(UTT)       |
|                                                                              | Dyslexia | 21 | 121.71 | 6.497     |           | N/A    | N/A |                     |
| I1                                                                           | Control  | 24 | 135.38 | 7.149     | -6.720    | N/A    | N/A | .004<br>(UTT)       |
|                                                                              | Dyslexia | 21 | 142.10 | 7.516     |           | N/A    | N/A |                     |
| I2                                                                           | Control  | 24 | 111.04 | 6.868     | -4.482    | N/A    | N/A | .042<br>(UTT)       |
|                                                                              | Dyslexia | 21 | 115.52 | 7.467     |           | N/A    | N/A |                     |
| Middle retinal layers (INL+OPL+ONL). Comparisons between groups (Left eyes)  |          |    |        |           |           |        |     |                     |
|                                                                              | Group    | n  | Mean   | Std. dev. | Mean Dif. | Median | IQR | Significance (test) |
| C0                                                                           | Control  | 25 | N/A    | N/A       | N/A       | 123.00 | 10  | .061<br>(MWT)       |
|                                                                              | Dyslexia | 19 | 131.63 | 11.142    |           | 132.00 | 14  |                     |
| N1                                                                           | Control  | 25 | 139.92 | 6.519     | -7.659    | N/A    | N/A | .002<br>(UTT)       |
|                                                                              | Dyslexia | 19 | 147.58 | 8.637     |           | N/A    | N/A |                     |
| N2                                                                           | Control  | 25 | 120.60 | 5.723     | -4.032    | N/A    | N/A | .073<br>(UTT)       |
|                                                                              | Dyslexia | 19 | 124.63 | 8.802     |           | N/A    | N/A |                     |
| S1                                                                           | Control  | 25 | 139.12 | 7.418     | -6.722    | N/A    | N/A | .008<br>(UTT)       |
|                                                                              | Dyslexia | 19 | 145.84 | 8.636     |           | N/A    | N/A |                     |
| S2                                                                           | Control  | 25 | 120.44 | 6.430     | -3.876    | N/A    | N/A | .083<br>(UTT)       |
|                                                                              | Dyslexia | 19 | 124.32 | 8.070     |           | N/A    | N/A |                     |
| T1                                                                           | Control  | 25 | 135.84 | 6.908     | -6.055    | N/A    | N/A | .007<br>(UTT)       |
|                                                                              | Dyslexia | 19 | 141.89 | 7.172     |           | N/A    | N/A |                     |
| T2                                                                           | Control  | 25 | 117.20 | 6.640     | -4.274    | N/A    | N/A | .039<br>(UTT)       |
|                                                                              | Dyslexia | 19 | 121.47 | 6.561     |           | N/A    | N/A |                     |
| I1                                                                           | Control  | 25 | 134.64 | 6.563     | -7.044    | N/A    | N/A | .002<br>(UTT)       |
|                                                                              | Dyslexia | 19 | 141.68 | 7.454     |           | N/A    | N/A |                     |
| I2                                                                           | Control  | 25 | 110.96 | 6.181     | -3.040    | N/A    | N/A | .123<br>(UTT)       |
|                                                                              | Dyslexia | 19 | 114.00 | 6.566     |           | N/A    | N/A |                     |

**Table S3. Thickness comparison between groups for the middle retinal layers (INL+OPL+ONL) in the ETDRS grid.** Right and left eyes were separately compared. T=Temporal, N=nasal, S=superior, I=Inferior, C0=fovea. Number 1 and number 2 refer to the inner ring and the outer ring, respectively, and correspond to the parafovea (inner ring) and the perifovea (outer ring). n=number, Std. Dev=standard deviation, Dif.=Difference, IQR=interquartile range, UTT= Unpaired t-test MWT=Mann-Whitney test, N/A=not applicable. The thickness results are expressed as microns. Statistically significant results are depicted in bold.

| Outer plexiform layer + Outer nuclear layer (OPL+ONL) |          |    |        |           |           |        |     |                     |
|-------------------------------------------------------|----------|----|--------|-----------|-----------|--------|-----|---------------------|
| Comparisons between groups (Right eyes)               |          |    |        |           |           |        |     |                     |
|                                                       | Group    | n  | Mean   | Std. dev. | Mean Dif. | Median | IQR | Significance (test) |
| <b>C0</b>                                             | Control  | 24 | 110.17 | 6.391     | -6.024    | N/A    | N/A | <b>.015</b>         |
|                                                       | Dyslexia | 21 | 116.19 | 9.506     |           | N/A    | N/A | (UTT)               |
| <b>N1</b>                                             | Control  | 24 | 101.00 | 6.481     | -8.048    | N/A    | N/A | <b>.001</b>         |
|                                                       | Dyslexia | 21 | 109.05 | 8.564     |           | N/A    | N/A | (UTT)               |
| <b>N2</b>                                             | Control  | 24 | 84.88  | 5.818     | -3.887    | N/A    | N/A | .066                |
|                                                       | Dyslexia | 21 | 88.76  | 7.968     |           | N/A    | N/A | (UTT)               |
| <b>S1</b>                                             | Control  | 24 | 98.67  | 5.483     | -7.619    | N/A    | N/A | <b>.003</b>         |
|                                                       | Dyslexia | 21 | 106.29 | 10.110    |           | N/A    | N/A | (UTT)               |
| <b>S2</b>                                             | Control  | 24 | 86.96  | 5.196     | -2.518    | N/A    | N/A | .160                |
|                                                       | Dyslexia | 21 | 89.48  | 6.615     |           | N/A    | N/A | (UTT)               |
| <b>T1</b>                                             | Control  | 24 | 98.25  | 5.995     | -5.940    | N/A    | N/A | <b>.002</b>         |
|                                                       | Dyslexia | 21 | 104.19 | 6.298     |           | N/A    | N/A | (UTT)               |
| <b>T2</b>                                             | Control  | 24 | 82.50  | 5.275     | -3.786    | N/A    | N/A | <b>.019</b>         |
|                                                       | Dyslexia | 21 | 86.29  | 5.081     |           | N/A    | N/A | (UTT)               |
| <b>I1</b>                                             | Control  | 24 | 94.83  | 6.141     | -5.024    | N/A    | N/A | <b>.012</b>         |
|                                                       | Dyslexia | 21 | 99.86  | 6.762     |           | N/A    | N/A | (UTT)               |
| <b>I2</b>                                             | Control  | 24 | 77.96  | 5.369     | -3.042    | N/A    | N/A | .082                |
|                                                       | Dyslexia | 21 | 81.00  | 6.075     |           | N/A    | N/A | (UTT)               |
| Outer plexiform layer + Outer nuclear layer (OPL+ONL) |          |    |        |           |           |        |     |                     |
| Comparisons between groups (Left eyes)                |          |    |        |           |           |        |     |                     |
|                                                       | Group    | n  | Mean   | Std. dev. | Mean Dif. | Median | IQR | Significance (test) |
| <b>C0</b>                                             | Control  | 25 | 109.28 | 6.471     | -6.141    | N/A    | N/A | <b>.018</b>         |
|                                                       | Dyslexia | 19 | 115.42 | 9.985     |           | N/A    | N/A | (UTT)               |
| <b>N1</b>                                             | Control  | 25 | 100.88 | 6.790     | -5.857    | N/A    | N/A | <b>.017</b>         |
|                                                       | Dyslexia | 19 | 106.74 | 8.837     |           | N/A    | N/A | (UTT)               |
| <b>N2</b>                                             | Control  | 25 | 85.16  | 5.437     | -2.366    | N/A    | N/A | .236                |
|                                                       | Dyslexia | 19 | 87.53  | 7.618     |           | N/A    | N/A | (UTT)               |
| <b>S1</b>                                             | Control  | 25 | 99.68  | 5.879     | -4.952    | N/A    | N/A | <b>.017</b>         |
|                                                       | Dyslexia | 19 | 104.63 | 7.289     |           | N/A    | N/A | (UTT)               |
| <b>S2</b>                                             | Control  | 25 | 87.00  | 5.083     | -3.368    | N/A    | N/A | .065                |
|                                                       | Dyslexia | 19 | 90.37  | 6.718     |           | N/A    | N/A | (UTT)               |
| <b>T1</b>                                             | Control  | 25 | 98.08  | 5.575     | -5.025    | N/A    | N/A | <b>.011</b>         |
|                                                       | Dyslexia | 19 | 103.11 | 6.887     |           | N/A    | N/A | (UTT)               |
| <b>T2</b>                                             | Control  | 25 | 82.88  | 5.167     | -3.120    | N/A    | N/A | .058                |
|                                                       | Dyslexia | 19 | 86.00  | 5.364     |           | N/A    | N/A | (UTT)               |
| <b>I1</b>                                             | Control  | 25 | 95.16  | 6.860     | -4.893    | N/A    | N/A | <b>.025</b>         |
|                                                       | Dyslexia | 19 | 100.05 | 7.012     |           | N/A    | N/A | (UTT)               |
| <b>I2</b>                                             | Control  | 25 | 78.04  | 5.519     | -2.855    | N/A    | N/A | .092                |
|                                                       | Dyslexia | 19 | 80.89  | 5.332     |           | N/A    | N/A | (UTT)               |

**Table S4. Thickness comparison between groups for the outer plexiform layer + outer nuclear layer in the ETDRS grid.** Right and left eyes were independently compared. T=temporal, N=nasal, S=superior, I=inferior, C0=fovea. Number 1 and number 2 refer to the inner ring and the outer ring, respectively, and correspond to the parafovea (inner ring) and the perifovea (outer ring). n=number, Std. Dev=standard deviation, Dif.=Difference, IQR=interquartile range, UTT= Unpaired t-test MWT=Mann-Whitney test, N/A=not applicable. The thickness results are expressed as microns. Statistically significant results are depicted in bold.

| Inner plexiform layer (IPL). Comparisons between groups (Right eyes) |          |    |       |           |           |        |     |                     |
|----------------------------------------------------------------------|----------|----|-------|-----------|-----------|--------|-----|---------------------|
|                                                                      | Group    | n  | Mean  | Std. dev. | Mean Dif. | Median | IQR | Significance (test) |
| C0                                                                   | Control  | 24 | N/A   | N/A       | N/A       | 19.00  | 6   | .864                |
|                                                                      | Dyslexia | 21 | 19.95 | 3.339     |           | 20.00  | 5   | (MWT)               |
| N1                                                                   | Control  | 24 | 41.50 | 2.467     | -1.357    | N/A    | N/A | .177                |
|                                                                      | Dyslexia | 21 | 42.86 | 3.877     |           | N/A    | N/A | (UTT)               |
| N2                                                                   | Control  | 24 | 30.46 | 2.105     | -.494     | N/A    | N/A | .591                |
|                                                                      | Dyslexia | 21 | 30.95 | 3.681     |           | N/A    | N/A | (UTT)               |
| S1                                                                   | Control  | 24 | 41.13 | 1.895     | N/A       | 41.00  | 7   | .520                |
|                                                                      | Dyslexia | 21 | N/A   | N/A       |           | 42.00  | 8   | (MWT)               |
| S2                                                                   | Control  | 24 | 28.58 | 2.394     | -.655     | N/A    | N/A | .419                |
|                                                                      | Dyslexia | 21 | 29.24 | 2.982     |           | N/A    | N/A | (UTT)               |
| T1                                                                   | Control  | 24 | N/A   | N/A       | N/A       | 41.00  | 7   | .440                |
|                                                                      | Dyslexia | 21 | 41.19 | 3.010     |           | 42.00  | 11  | (MWT)               |
| T2                                                                   | Control  | 24 | 31.83 | 2.278     | -.738     | N/A    | N/A | .330                |
|                                                                      | Dyslexia | 21 | 32.57 | 2.749     |           | N/A    | N/A | (UTT)               |
| I1                                                                   | Control  | 24 | 41.33 | 1.465     | -1.190    | N/A    | N/A | <b>.034</b>         |
|                                                                      | Dyslexia | 21 | 42.52 | 2.159     |           | N/A    | N/A | (UTT)               |
| I2                                                                   | Control  | 24 | 27.67 | 2.160     | -.333     | N/A    | N/A | .692                |
|                                                                      | Dyslexia | 21 | 28.00 | 3.391     |           | N/A    | N/A | (UTT)               |
| Inner plexiform layer (IPL). Comparisons between groups (Left eyes)  |          |    |       |           |           |        |     |                     |
|                                                                      | Group    | n  | Mean  | Std. dev. | Mean Dif. | Median | IQR | Significance (test) |
| C0                                                                   | Control  | 25 | N/A   | N/A       | N/A       | 19.00  | 5   | .895                |
|                                                                      | Dyslexia | 19 | 20.00 | 3.091     |           | 20.00  | 4   | (MWT)               |
| N1                                                                   | Control  | 25 | 41.88 | 2.386     | -1.962    | N/A    | N/A | <b>.013</b>         |
|                                                                      | Dyslexia | 19 | 43.84 | 2.588     |           | N/A    | N/A | (UTT)               |
| N2                                                                   | Control  | 25 | N/A   | N/A       | N/A       | 31.00  | 7   | .187                |
|                                                                      | Dyslexia | 19 | 31.42 | 3.254     |           | 32.00  | 12  | (MWT)               |
| S1                                                                   | Control  | 25 | 41.48 | 1.917     | -1.099    | N/A    | N/A | .120                |
|                                                                      | Dyslexia | 19 | 42.58 | 2.673     |           | N/A    | N/A | (UTT)               |
| S2                                                                   | Control  | 25 | 28.68 | 2.340     | -1.057    | N/A    | N/A | .199                |
|                                                                      | Dyslexia | 19 | 29.74 | 3.034     |           | N/A    | N/A | (UTT)               |
| T1                                                                   | Control  | 25 | 40.44 | 1.710     | -1.981    | N/A    | N/A | <b>.009</b>         |
|                                                                      | Dyslexia | 19 | 42.42 | 2.694     |           | N/A    | N/A | (UTT)               |
| T2                                                                   | Control  | 25 | 31.80 | 2.062     | -.989     | N/A    | N/A | .180                |
|                                                                      | Dyslexia | 19 | 32.79 | 2.760     |           | N/A    | N/A | (UTT)               |
| I1                                                                   | Control  | 25 | 41.04 | 2.189     | -1.171    | N/A    | N/A | .123                |
|                                                                      | Dyslexia | 19 | 42.21 | 2.740     |           | N/A    | N/A | (UTT)               |
| I2                                                                   | Control  | 25 | N/A   | N/A       | N/A       | 28.00  | 4   | .885                |
|                                                                      | Dyslexia | 19 | 27.89 | 2.601     |           | 28.00  | 3   | (MWT)               |

**Table S5. Thickness comparison between groups for the inner plexiform layer in the ETDRS grid.**

Right and left eyes were independently compared. T=temporal, N=nasal, S=superior, I=inferior, C0=fovea. Number 1 and number 2 refer to the inner ring and the outer ring, respectively, and correspond to the parafovea (inner ring) and the perifovea (outer ring). n=number, Std. Dev=standard deviation, Dif.=Difference, IQR=interquartile range, UTT= Unpaired t-test MWT=Mann-Whitney test, N/A=not applicable. The thickness results are expressed as microns. Statistically significant results are depicted in bold.

| Inner nuclear layer (INL). Comparisons between groups (Right eyes) |          |    |       |           |           |        |     |                     |
|--------------------------------------------------------------------|----------|----|-------|-----------|-----------|--------|-----|---------------------|
|                                                                    | Group    | n  | Mean  | Std. dev. | Mean Dif. | Median | IQR | Significance (test) |
| C0                                                                 | Control  | 24 | 16.63 | 3.899     | -.327     | N/A    | N/A | .789                |
|                                                                    | Dyslexia | 21 | 16.95 | 4.260     |           | N/A    | N/A | (UTT)               |
| N1                                                                 | Control  | 24 | 38.88 | 2.833     | -1.887    | N/A    | N/A | .035                |
|                                                                    | Dyslexia | 21 | 40.76 | 2.982     |           | N/A    | N/A | (UTT)               |
| N2                                                                 | Control  | 24 | 35.67 | 1.971     | N/A       | 35.50  | 4   | .055                |
|                                                                    | Dyslexia | 21 | N/A   | N/A       |           | 37.00  | 4   | (MWT)               |
| S1                                                                 | Control  | 24 | 39.38 | 2.901     | -1.815    | N/A    | N/A | .036                |
|                                                                    | Dyslexia | 21 | 41.19 | 2.695     |           | N/A    | N/A | (UTT)               |
| S2                                                                 | Control  | 24 | 32.71 | 1.989     | -.911     | N/A    | N/A | .183                |
|                                                                    | Dyslexia | 21 | 33.62 | 2.519     |           | N/A    | N/A | (UTT)               |
| T1                                                                 | Control  | 24 | 37.71 | 2.758     | -1.815    | N/A    | N/A | .052                |
|                                                                    | Dyslexia | 21 | 39.52 | 3.341     |           | N/A    | N/A | (UTT)               |
| T2                                                                 | Control  | 24 | 34.54 | 2.146     | N/A       | 35.00  | 3   | .124                |
|                                                                    | Dyslexia | 21 | N/A   | N/A       |           | 35.00  | 3   | (MWT)               |
| I1                                                                 | Control  | 24 | 40.54 | 3.413     | -1.696    | N/A    | N/A | .094                |
|                                                                    | Dyslexia | 21 | 42.24 | 3.208     |           | N/A    | N/A | (UTT)               |
| I2                                                                 | Control  | 24 | 33.08 | 2.358     | N/A       | 33.00  | 4   | .075                |
|                                                                    | Dyslexia | 21 | N/A   | N/A       |           | 34.00  | 3   | (MWT)               |
| Inner nuclear layer (INL). Comparisons between groups (Left eyes)  |          |    |       |           |           |        |     |                     |
|                                                                    | Group    | n  | Mean  | Std. dev. | Mean Dif. | Median | IQR | Significance (test) |
| C0                                                                 | Control  | 25 | 17.16 | 4.190     | .949      | N/A    | N/A | .446                |
|                                                                    | Dyslexia | 19 | 16.21 | 3.867     |           | N/A    | N/A | (UTT)               |
| N1                                                                 | Control  | 25 | N/A   | N/A       | N/A       | 38.00  | 4   | .017                |
|                                                                    | Dyslexia | 19 | 40.84 | 2.651     |           | 41.00  | 6   | (MWT)               |
| N2                                                                 | Control  | 25 | N/A   | N/A       | N/A       | 36.00  | 9   | .024                |
|                                                                    | Dyslexia | 19 | 37.11 | 2.558     |           | 37.00  | 4   | (MWT)               |
| S1                                                                 | Control  | 25 | 39.44 | 3.070     | -1.771    | N/A    | N/A | .072                |
|                                                                    | Dyslexia | 19 | 41.21 | 3.259     |           | N/A    | N/A | (UTT)               |
| S2                                                                 | Control  | 25 | 33.44 | 2.678     | -.507     | N/A    | N/A | .512                |
|                                                                    | Dyslexia | 19 | 33.95 | 2.297     |           | N/A    | N/A | (UTT)               |
| T1                                                                 | Control  | 25 | N/A   | N/A       | N/A       | 37.00  | 11  | .132                |
|                                                                    | Dyslexia | 19 | 38.79 | 2.992     |           | 38.00  | 4   | (MWT)               |
| T2                                                                 | Control  | 25 | 34.32 | 2.495     | -1.154    | N/A    | N/A | .113                |
|                                                                    | Dyslexia | 19 | 35.47 | 2.118     |           | N/A    | N/A | (UTT)               |
| I1                                                                 | Control  | 25 | N/A   | N/A       | N/A       | 39.00  | 4   | .006                |
|                                                                    | Dyslexia | 19 | 41.63 | 2.432     |           | 42.00  | 4   | (MWT)               |
| I2                                                                 | Control  | 25 | 32.92 | 2.783     | -.185     | N/A    | N/A | .805                |
|                                                                    | Dyslexia | 19 | 33.11 | 1.912     |           | N/A    | N/A | (UTT)               |

**Table S6. Thickness comparison between groups for the inner nuclear layer in the ETDRS grid.** Right and left eyes were independently compared. T=temporal, N=nasal, S=superior, I=inferior, C0=fovea. Number 1 and number 2 refer to the inner ring and the outer ring, respectively, and correspond to the parafovea (inner ring) and the perifovea (outer ring). n=number, Std. Dev=standard deviation, Dif.=Difference, IQR=interquartile range, UTT= Unpaired t-test MWT=Mann-Whitney test, N/A=not applicable. The thickness results are expressed as microns. Statistically significant results are depicted in bold.

| Inner plexiform layer + Inner nuclear layer (IPL + INL). |          |    |       |           |           |        |     |                     |
|----------------------------------------------------------|----------|----|-------|-----------|-----------|--------|-----|---------------------|
| Comparisons between groups (Right eyes)                  |          |    |       |           |           |        |     |                     |
|                                                          | Group    | n  | Mean  | Std. dev. | Mean Dif. | Median | IQR | Significance (test) |
| C0                                                       | Control  | 24 | 36.96 | 7.445     | .054      | N/A    | N/A | .980                |
|                                                          | Dyslexia | 21 | 36.90 | 6.848     |           | N/A    | N/A | (UTT)               |
| N1                                                       | Control  | 24 | 80.38 | 4.499     | -3.244    | N/A    | N/A | .026                |
|                                                          | Dyslexia | 21 | 83.62 | 4.934     |           | N/A    | N/A | (UTT)               |
| N2                                                       | Control  | 24 | 66.13 | 3.722     | -2.351    | N/A    | N/A | .112                |
|                                                          | Dyslexia | 21 | 68.48 | 5.887     |           | N/A    | N/A | (UTT)               |
| S1                                                       | Control  | 24 | 80.50 | 4.075     | -1.738    | N/A    | N/A | .228                |
|                                                          | Dyslexia | 21 | 82.24 | 5.431     |           | N/A    | N/A | (UTT)               |
| S2                                                       | Control  | 24 | 61.29 | 3.793     | -1.565    | N/A    | N/A | .254                |
|                                                          | Dyslexia | 21 | 62.86 | 5.247     |           | N/A    | N/A | (UTT)               |
| T1                                                       | Control  | 24 | 78.38 | 3.704     | -2.339    | N/A    | N/A | .065                |
|                                                          | Dyslexia | 21 | 80.71 | 4.584     |           | N/A    | N/A | (UTT)               |
| T2                                                       | Control  | 24 | 66.38 | 3.910     | -1.625    | N/A    | N/A | .216                |
|                                                          | Dyslexia | 21 | 68.00 | 4.775     |           | N/A    | N/A | (UTT)               |
| I1                                                       | Control  | 24 | 81.88 | 4.100     | -2.887    | N/A    | N/A | .033                |
|                                                          | Dyslexia | 21 | 84.76 | 4.711     |           | N/A    | N/A | (UTT)               |
| I2                                                       | Control  | 24 | 60.75 | 4.035     | -1.774    | N/A    | N/A | .218                |
|                                                          | Dyslexia | 21 | 62.52 | 5.446     |           | N/A    | N/A | (UTT)               |
| Inner plexiform layer + Inner nuclear layer (IPL + INL). |          |    |       |           |           |        |     |                     |
| Comparisons between groups (Left eyes)                   |          |    |       |           |           |        |     |                     |
|                                                          | Group    | n  | Mean  | Std. dev. | Mean Dif. | Median | IQR | Significance (test) |
| C0                                                       | Control  | 25 | 37.44 | 7.018     | 1.229     | N/A    | N/A | .551                |
|                                                          | Dyslexia | 19 | 36.21 | 6.294     |           | N/A    | N/A | (UTT)               |
| N1                                                       | Control  | 25 | 80.92 | 4.847     | -3.764    | N/A    | N/A | .011                |
|                                                          | Dyslexia | 19 | 84.68 | 4.347     |           | N/A    | N/A | (UTT)               |
| N2                                                       | Control  | 25 | 65.88 | 3.180     | -2.646    | N/A    | N/A | .066                |
|                                                          | Dyslexia | 19 | 68.53 | 5.337     |           | N/A    | N/A | (UTT)               |
| S1                                                       | Control  | 25 | 80.92 | 3.989     | -2.869    | N/A    | N/A | .036                |
|                                                          | Dyslexia | 19 | 83.79 | 4.803     |           | N/A    | N/A | (UTT)               |
| S2                                                       | Control  | 25 | 62.12 | 4.567     | -1.564    | N/A    | N/A | .279                |
|                                                          | Dyslexia | 19 | 63.68 | 4.831     |           | N/A    | N/A | (UTT)               |
| T1                                                       | Control  | 25 | 78.20 | 4.193     | -3.011    | N/A    | N/A | .018                |
|                                                          | Dyslexia | 19 | 81.21 | 3.750     |           | N/A    | N/A | (UTT)               |
| T2                                                       | Control  | 25 | 66.12 | 4.186     | -2.143    | N/A    | N/A | .111                |
|                                                          | Dyslexia | 19 | 68.26 | 4.507     |           | N/A    | N/A | (UTT)               |
| I1                                                       | Control  | 25 | 80.52 | 4.436     | -3.322    | N/A    | N/A | .020                |
|                                                          | Dyslexia | 19 | 83.84 | 4.598     |           | N/A    | N/A | (UTT)               |
| I2                                                       | Control  | 25 | 60.52 | 4.032     | -.480     | N/A    | N/A | .706                |
|                                                          | Dyslexia | 19 | 61.00 | 4.308     |           | N/A    | N/A | (UTT)               |

**Table S7. Thickness comparison between groups for the Inner plexiform layer + Inner nuclear layer in the ETDRS grid.** Right and left eyes were independently compared. T=temporal, N=nasal, S=superior, I=inferior, C0=fovea. Number 1 and number 2 refer to the inner ring and the outer ring, respectively, and correspond to the parafovea (inner ring) and the perifovea (outer ring). n=number, Std. Dev=standard deviation, Dif.=Difference, IQR=interquartile range, UTT= Unpaired t-test MWT=Mann-Whitney test, N/A=not applicable. The thickness results are expressed as microns. Statistically significant results are depicted in bold.

| Retinal nerve fiber layer (RNFL). Comparisons between groups (Right eyes) |          |    |       |           |           |        |     |                     |
|---------------------------------------------------------------------------|----------|----|-------|-----------|-----------|--------|-----|---------------------|
|                                                                           | Group    | n  | Mean  | Std. dev. | Mean Dif. | Median | IQR | Significance (test) |
| C0                                                                        | Control  | 24 | N/A   | N/A       | N/A       | 11.0   | 4   | .645                |
|                                                                           | Dyslexia | 21 | 10.86 | 2.151     |           | 11.0   | 3   | (MWT)               |
| N1                                                                        | Control  | 24 | N/A   | N/A       | N/A       | 19     | 3   | .316                |
|                                                                           | Dyslexia | 21 | 19.00 | 2.049     |           | 19     | 3   | (MWT)               |
| N2                                                                        | Control  | 24 | 46.71 | 6.963     | 1.851     | N/A    | N/A | .339                |
|                                                                           | Dyslexia | 21 | 44.86 | 5.712     |           | N/A    | N/A | (UTT)               |
| S1                                                                        | Control  | 24 | 22.54 | 2.206     | .113      | N/A    | N/A | .864                |
|                                                                           | Dyslexia | 21 | 22.43 | 2.181     |           | N/A    | N/A | (UTT)               |
| S2                                                                        | Control  | 24 | 34.33 | 5.983     | -.476     | N/A    | N/A | .751                |
|                                                                           | Dyslexia | 21 | 34.81 | 3.544     |           | N/A    | N/A | (UTT)               |
| T1                                                                        | Control  | 24 | 16.08 | 1.018     | .607      | N/A    | N/A | .085                |
|                                                                           | Dyslexia | 21 | 15.48 | 1.289     |           | N/A    | N/A | (UTT)               |
| T2                                                                        | Control  | 24 | 17.46 | 1.285     | .363      | N/A    | N/A | .338                |
|                                                                           | Dyslexia | 21 | 17.10 | 1.221     |           | N/A    | N/A | (UTT)               |
| I1                                                                        | Control  | 24 | N/A   | N/A       | N/A       | 24     | 5   | .201                |
|                                                                           | Dyslexia | 21 | 23.19 | 2.482     |           | 23     | 3   | (MWT)               |
| I2                                                                        | Control  | 24 | N/A   | N/A       | N/A       | 38.5   | 11  | .236                |
|                                                                           | Dyslexia | 21 | 37.29 | 4.849     |           | 37.0   | 7   | (MWT)               |
| Retinal nerve fiber layer (RNFL). Comparisons between groups (Left eyes)  |          |    |       |           |           |        |     |                     |
|                                                                           | Group    | n  | Mean  | Std. dev. | Mean Dif. | Median | IQR | Significance (test) |
| C0                                                                        | Control  | 25 | N/A   | N/A       | N/A       | 11.0   | 3   | .799                |
|                                                                           | Dyslexia | 19 | 11.05 | 2.013     |           | 11.0   | 2   | (MWT)               |
| N1                                                                        | Control  | 25 | 19.48 | 1.447     | .674      | N/A    | N/A | .703                |
|                                                                           | Dyslexia | 19 | 19.42 | 1.644     |           | N/A    | N/A | (UTT)               |
| N2                                                                        | Control  | 25 | 46.20 | 5.553     | -.215     | N/A    | N/A | .769                |
|                                                                           | Dyslexia | 19 | 45.53 | 6.040     |           | N/A    | N/A | (UTT)               |
| S1                                                                        | Control  | 25 | 21.68 | 2.545     | .533      | N/A    | N/A | .708                |
|                                                                           | Dyslexia | 19 | 21.89 | 2.158     |           | N/A    | N/A | (UTT)               |
| S2                                                                        | Control  | 25 | 34.48 | 5.001     | .008      | N/A    | N/A | .975                |
|                                                                           | Dyslexia | 19 | 33.95 | 4.102     |           | N/A    | N/A | (UTT)               |
| T1                                                                        | Control  | 25 | N/A   | N/A       | N/A       | 16.0   | 1   | .759                |
|                                                                           | Dyslexia | 19 | 15.63 | 1.012     |           | 16.0   | 1   | (MWT)               |
| T2                                                                        | Control  | 25 | N/A   | N/A       | N/A       | 17.0   | 1   | .054                |
|                                                                           | Dyslexia | 19 | N/A   | N/A       |           | 17.0   | 1   | (MWT)               |
| I1                                                                        | Control  | 25 | N/A   | N/A       | N/A       | 25.0   | 2   | .341                |
|                                                                           | Dyslexia | 19 | 23.32 | 2.029     |           | 24.0   | 3   | (MWT)               |
| I2                                                                        | Control  | 25 | 37.60 | 6.124     | .059      | N/A    | N/A | .900                |
|                                                                           | Dyslexia | 19 | 36.42 | 4.376     |           | N/A    | N/A | (UTT)               |

**Table S8. Thickness comparison between groups for the retinal nerve fiber layer (RNFL) in the ETDRS grid.** Right and left eyes were independently compared. T=temporal, N=nasal, S=superior, I=inferior, C0=fovea. Number 1 and number 2 refer to the inner ring and the outer ring, respectively, and correspond to the parafovea (inner ring) and the perifovea (outer ring). n=number, Std. Dev=standard deviation, Dif.=Difference, IQR=interquartile range, UTT= Unpaired t-test MWT=Mann-Whitney test, N/A=not applicable. The thickness results are expressed as microns.



| Ganglion cell layer. Comparisons between groups (Right eyes) |          |    |       |           |           |        |     |                     |
|--------------------------------------------------------------|----------|----|-------|-----------|-----------|--------|-----|---------------------|
|                                                              | Group    | n  | Mean  | Std. dev. | Mean Dif. | Median | IQR | Significance (test) |
| C0                                                           | Control  | 24 | N/A   | N/A       | N/A       | 13.5   | 7   | .846                |
|                                                              | Dyslexia | 21 | 14.33 | 4.066     |           | 15     | 6   | (MWT)               |
| N1                                                           | Control  | 24 | 51.92 | 3.550     | -0.32     | N/A    | N/A | .804                |
|                                                              | Dyslexia | 21 | 52.24 | 5.029     |           | N/A    | N/A | (UTT)               |
| N2                                                           | Control  | 24 | 40.13 | 2.787     | 0.17      | N/A    | N/A | .895                |
|                                                              | Dyslexia | 21 | 39.95 | 5.315     |           | N/A    | N/A | (UTT)               |
| S1                                                           | Control  | 24 | 53.71 | 3.071     | N/A       | 53     | 4   | .846                |
|                                                              | Dyslexia | 21 | N/A   | N/A       |           | 55     | 5   | (MWT)               |
| S2                                                           | Control  | 24 | 35.83 | 3.422     | -0.31     | N/A    | N/A | .782                |
|                                                              | Dyslexia | 21 | 36.14 | 4.028     |           | N/A    | N/A | (UTT)               |
| T1                                                           | Control  | 24 | 49.75 | 3.096     | 0.94      | N/A    | N/A | .394                |
|                                                              | Dyslexia | 21 | 48.81 | 4.214     |           | N/A    | N/A | (UTT)               |
| T2                                                           | Control  | 24 | 37.21 | 4.170     | 0.54      | N/A    | N/A | .697                |
|                                                              | Dyslexia | 21 | 36.67 | 5.083     |           | N/A    | N/A | (UTT)               |
| I1                                                           | Control  | 24 | N/A   | N/A       | N/A       | 53     | 3   | .463                |
|                                                              | Dyslexia | 21 | 53.86 | 3.785     |           | 54     | 6   | (MWT)               |
| I2                                                           | Control  | 24 | 34.75 | 2.953     | -0.16     | N/A    | N/A | .891                |
|                                                              | Dyslexia | 21 | 34.90 | 4.482     |           | N/A    | N/A | (UTT)               |
| Ganglion cell layer. Comparisons between groups (Left eyes)  |          |    |       |           |           |        |     |                     |
|                                                              | Group    | n  | Mean  | Std. dev. | Mean Dif. | Median | IQR | Significance (test) |
| C0                                                           | Control  | 25 | N/A   | N/A       | N/A       | 13     | 7   | .398                |
|                                                              | Dyslexia | 19 | 14.16 | 4.337     |           | 13     | 7   | (MWT)               |
| N1                                                           | Control  | 25 | 52.04 | 3.310     | -0.59     | N/A    | N/A | .603                |
|                                                              | Dyslexia | 19 | 52.63 | 4.193     |           | N/A    | N/A | (UTT)               |
| N2                                                           | Control  | 25 | 39.96 | 2.638     | -0.83     | N/A    | N/A | .477                |
|                                                              | Dyslexia | 19 | 40.79 | 4.454     |           | N/A    | N/A | (UTT)               |
| S1                                                           | Control  | 25 | 53.36 | 3.147     | N/A       | 53     | 5   | .520                |
|                                                              | Dyslexia | 19 | N/A   | N/A       |           | 54     | 6   | (MWT)               |
| S2                                                           | Control  | 25 | 36.28 | 3.129     | -0.30     | N/A    | N/A | .773                |
|                                                              | Dyslexia | 19 | 36.58 | 3.687     |           | N/A    | N/A | (UTT)               |
| T1                                                           | Control  | 25 | 48.88 | 3.308     | -0.38     | N/A    | N/A | .721                |
|                                                              | Dyslexia | 19 | 49.26 | 3.754     |           | N/A    | N/A | (UTT)               |
| T2                                                           | Control  | 25 | 36.52 | 3.959     | 0.20      | N/A    | N/A | .872                |
|                                                              | Dyslexia | 19 | 36.32 | 4.334     |           | N/A    | N/A | (UTT)               |
| I1                                                           | Control  | 25 | N/A   | N/A       | N/A       | 53     | 4   | .691                |
|                                                              | Dyslexia | 19 | 53.47 | 4.060     |           | 53     | 6   | (MWT)               |
| I2                                                           | Control  | 25 | 34.80 | 3.240     | 0.27      | N/A    | N/A | .794                |
|                                                              | Dyslexia | 19 | 34.53 | 3.642     |           | N/A    | N/A | (UTT)               |

**Table S9. Thickness comparison between groups for the ganglion cell layer (GCL) in the ETDRS grid.** Right and left eyes were independently compared. T=temporal, N=nasal, S=superior, I=inferior, C0=fovea. Number 1 and number 2 refer to the inner ring and the outer ring, respectively, and correspond to the parafovea (inner ring) and the perifovea (outer ring). n=number, Std. Dev=standard deviation, Dif.=Difference, IQR=interquartile range, UTT= Unpaired t-test MWT=Mann-Whitney test, N/A=not applicable. The thickness results are expressed as microns.

| Ganglion Cell Complex. Comparisons between groups (Right eye) |          |    |        |           |           |        |     |                     |
|---------------------------------------------------------------|----------|----|--------|-----------|-----------|--------|-----|---------------------|
|                                                               | Group    | n  | Mean   | Std. dev. | Mean Dif. | Median | IQR | Significance (test) |
| C0                                                            | Control  | 24 | N/A    | N/A       | N/A       | 43.50  | 17  | .802                |
|                                                               | Dyslexia | 21 | 45.14  | 9.172     |           | 46     | 13  | (MWT)               |
| N1                                                            | Control  | 24 | 113.21 | 7.089     | -.887     | N/A    | N/A | .725                |
|                                                               | Dyslexia | 21 | 114.10 | 9.648     |           | N/A    | N/A | (UTT)               |
| N2                                                            | Control  | 24 | 117.29 | 8.888     | 1.530     | N/A    | N/A | .632                |
|                                                               | Dyslexia | 21 | 115.76 | 12.316    |           | N/A    | N/A | (UTT)               |
| S1                                                            | Control  | 24 | 117.38 | 6.149     | N/A       | 115    | 8   | .516                |
|                                                               | Dyslexia | 21 | N/A    | N/A       |           | 119    | 10  | (MWT)               |
| S2                                                            | Control  | 24 | 98.75  | 10.427    | -1.440    | N/A    | N/A | .630                |
|                                                               | Dyslexia | 21 | 100.19 | 9.315     |           | N/A    | N/A | (UTT)               |
| T1                                                            | Control  | 24 | 106.50 | 4.364     | N/A       | 106    | 6   | .710                |
|                                                               | Dyslexia | 21 | N/A    | N/A       |           | 108    | 14  | (MWT)               |
| T2                                                            | Control  | 24 | 86.50  | 6.200     | .167      | N/A    | N/A | .935                |
|                                                               | Dyslexia | 21 | 86.33  | 7.519     |           | N/A    | N/A | (UTT)               |
| I1                                                            | Control  | 24 | N/A    | N/A       | N/A       | 117    | 8   | .732                |
|                                                               | Dyslexia | 21 | 119.57 | 7.018     |           | 120    | 7   | (MWT)               |
| I2                                                            | Control  | 24 | 103.17 | 10.458    | 2.976     | N/A    | N/A | .353                |
|                                                               | Dyslexia | 21 | 100.19 | 10.792    |           | N/A    | N/A | (UTT)               |
| Ganglion Cell Complex. Comparisons between groups (Left eye)  |          |    |        |           |           |        |     |                     |
|                                                               | Group    | n  | Mean   | Std. dev. | Mean Dif. | Median | IQR | Significance (test) |
| C0                                                            | Control  | 25 | N/A    | N/A       | N/A       | 43     | 15  | .661                |
|                                                               | Dyslexia | 19 | 45.14  | 9.172     |           | 44     | 14  | (MWT)               |
| N1                                                            | Control  | 25 | 113.21 | 7.089     | -.887     | N/A    | N/A | .225                |
|                                                               | Dyslexia | 19 | 114.10 | 9.648     |           | N/A    | N/A | (UTT)               |
| N2                                                            | Control  | 25 | 117.29 | 8.888     |           | 116    | 14  | .991                |
|                                                               | Dyslexia | 19 | N/A    | N/A       | N/A       | 115    | 21  | (MWT)               |
| S1                                                            | Control  | 25 | 117.38 | 6.149     | 1.327     | N/A    | N/A | .327                |
|                                                               | Dyslexia | 19 | 116.05 | 11.066    |           | N/A    | N/A | (UTT)               |
| S2                                                            | Control  | 25 | 98.75  | 10.427    | -1.440    | N/A    | N/A | .770                |
|                                                               | Dyslexia | 19 | 100.19 | 9.315     |           | N/A    | N/A | (UTT)               |
| T1                                                            | Control  | 25 | 106.50 | 4.364     | 1.024     | N/A    | N/A | .130                |
|                                                               | Dyslexia | 19 | 105.48 | 7.339     |           | N/A    | N/A | (UTT)               |
| T2                                                            | Control  | 25 | N/A    | N/A       | N/A       | 84     | 9   | .484                |
|                                                               | Dyslexia | 19 | 86.33  | 7.519     |           | 86     | 13  | (MWT)               |
| I1                                                            | Control  | 25 | 120.42 | 8.293     | .845      | N/A    | N/A | .721                |
|                                                               | Dyslexia | 19 | 119.57 | 7.018     |           | N/A    | N/A | (UTT)               |
| I2                                                            | Control  | 25 | 103.17 | 10.458    | 2.976     | N/A    | N/A | .652                |
|                                                               | Dyslexia | 19 | 100.19 | 10.792    |           | N/A    | N/A | (UTT)               |

**Table S10. Thickness comparison between groups for the ganglion cell complex (GCC) in the ETDRS grid.** Right and left eyes were independently compared. T=temporal, N=nasal, S=superior, I=inferior, C0=fovea. Number 1 and number 2 refer to the inner ring and the outer ring, respectively, and correspond to the parafovea (inner ring) and the perifovea (outer ring). n=number, Std. Dev=standard deviation, Dif.=Difference, IQR=interquartile range, UTT= Unpaired t-test MWT=Mann-Whitney test, N/A=not applicable. The thickness results are expressed as microns.

| Outer retinal. Comparisons between groups (Right eyes) |          |    |       |           |           |        |     |                     |
|--------------------------------------------------------|----------|----|-------|-----------|-----------|--------|-----|---------------------|
|                                                        | Group    | n  | Mean  | Std. dev. | Mean Dif. | Median | IQR | Significance (test) |
| C0                                                     | Control  | 24 | 87.33 | 3.158     | 1.476     | N/A    | N/A | .116                |
|                                                        | Dyslexia | 21 | 85.86 | 2.988     |           | N/A    | N/A | (UTT)               |
| N1                                                     | Control  | 24 | 80.83 | 2.014     | .119      | N/A    | N/A | .843                |
|                                                        | Dyslexia | 21 | 80.71 | 1.978     |           | N/A    | N/A | (UTT)               |
| N2                                                     | Control  | 24 | 78.17 | 1.786     | -.167     | N/A    | N/A | .775                |
|                                                        | Dyslexia | 21 | 78.33 | 2.106     |           | N/A    | N/A | (UTT)               |
| S1                                                     | Control  | 24 | 79.38 | 2.584     | .423      | N/A    | N/A | .536                |
|                                                        | Dyslexia | 21 | 78.95 | 1.830     |           | N/A    | N/A | (UTT)               |
| S2                                                     | Control  | 24 | 77.25 | 1.984     | -.702     | N/A    | N/A | .246                |
|                                                        | Dyslexia | 21 | 77.95 | 2.012     |           | N/A    | N/A | (UTT)               |
| T1                                                     | Control  | 24 | 79.17 | 2.531     | .452      | N/A    | N/A | .488                |
|                                                        | Dyslexia | 21 | 78.71 | 1.648     |           | N/A    | N/A | (UTT)               |
| T2                                                     | Control  | 24 | 76.38 | 2.102     | -.149     | N/A    | N/A | .787                |
|                                                        | Dyslexia | 21 | 76.52 | 1.470     |           | N/A    | N/A | (UTT)               |
| I1                                                     | Control  | 24 | 78.54 | 2.064     | .208      | N/A    | N/A | .706                |
|                                                        | Dyslexia | 21 | 78.33 | 1.528     |           | N/A    | N/A | (UTT)               |
| I2                                                     | Control  | 24 | 75.83 | 1.786     | N/A       | 76     | 3   | .148                |
|                                                        | Dyslexia | 21 | N/A   | N/A       |           | 77     | 2   | (MWT)               |
| Outer retina. Comparisons between groups (Left eyes)   |          |    |       |           |           |        |     |                     |
|                                                        | Group    | n  | Mean  | Std. dev. | Mean Dif. | Median | IQR | Significance (test) |
| C0                                                     | Control  | 25 | 88.48 | 4.464     | 2.585     | N/A    | N/A | .051                |
|                                                        | Dyslexia | 19 | 85.89 | 3.740     |           | N/A    | N/A | (UTT)               |
| N1                                                     | Control  | 25 | 81.88 | 2.934     | 1.459     | N/A    | N/A | .069                |
|                                                        | Dyslexia | 19 | 80.42 | 1.981     |           | N/A    | N/A | (UTT)               |
| N2                                                     | Control  | 25 | 78.48 | 1.735     | N/A       | 79     | 3   | .238                |
|                                                        | Dyslexia | 19 | N/A   | N/A       |           | 78     | 4   | (MWT)               |
| S1                                                     | Control  | 25 | 79.28 | 2.654     | .701      | N/A    | N/A | .358                |
|                                                        | Dyslexia | 19 | 78.58 | 2.219     |           | N/A    | N/A | (UTT)               |
| S2                                                     | Control  | 25 | N/A   | N/A       | N/A       | 78     | 3   | .680                |
|                                                        | Dyslexia | 19 | 77.63 | 2.033     |           | 78     | 3   | (MWT)               |
| T1                                                     | Control  | 25 | 79.52 | 2.485     | N/A       | 80     | 4   | .256                |
|                                                        | Dyslexia | 19 | N/A   | N/A       |           | 79     | 3   | (MWT)               |
| T2                                                     | Control  | 25 | 76.44 | 2.219     | .124      | N/A    | N/A | .853                |
|                                                        | Dyslexia | 19 | 76.32 | 2.136     |           | N/A    | N/A | (UTT)               |
| I1                                                     | Control  | 25 | 78.80 | 2.449     | .800      | N/A    | N/A | .242                |
|                                                        | Dyslexia | 19 | 78.00 | 1.856     |           | N/A    | N/A | (UTT)               |
| I2                                                     | Control  | 25 | 76.08 | 1.605     | N/A       | 76     | 2   | .838                |
|                                                        | Dyslexia | 19 | N/A   | N/A       |           | 76     | 2   | (MWT)               |

**Table S11. Thickness comparison between groups for outer retina in the ETDRS grid.** Right and left eyes were independently compared. T=temporal, N=nasal, S=superior, I=inferior, C0=fovea. Number 1 and number 2 refer to the inner ring and the outer ring, respectively, and correspond to the parafovea (inner ring) and the perifovea (outer ring). n=number, Std. Dev=standard deviation, Dif.=Difference, IQR=interquartile range, UTT= Unpaired t-test MWT=Mann-Whitney test, N/A=not applicable. The thickness results are expressed as microns.
